# Supplementary material
Source: Springer Nature journal article supplement (https://www.springermedizin.de/resource/supplementary/13229_2013_75_MOESM3_ESM.pdf/9676108)

**FOXP1/18S rRNA**

60  
55  
50  
45  
40  
35  
30  
25  
20  
15  
10  
5  
0

**Control**

**ASD**

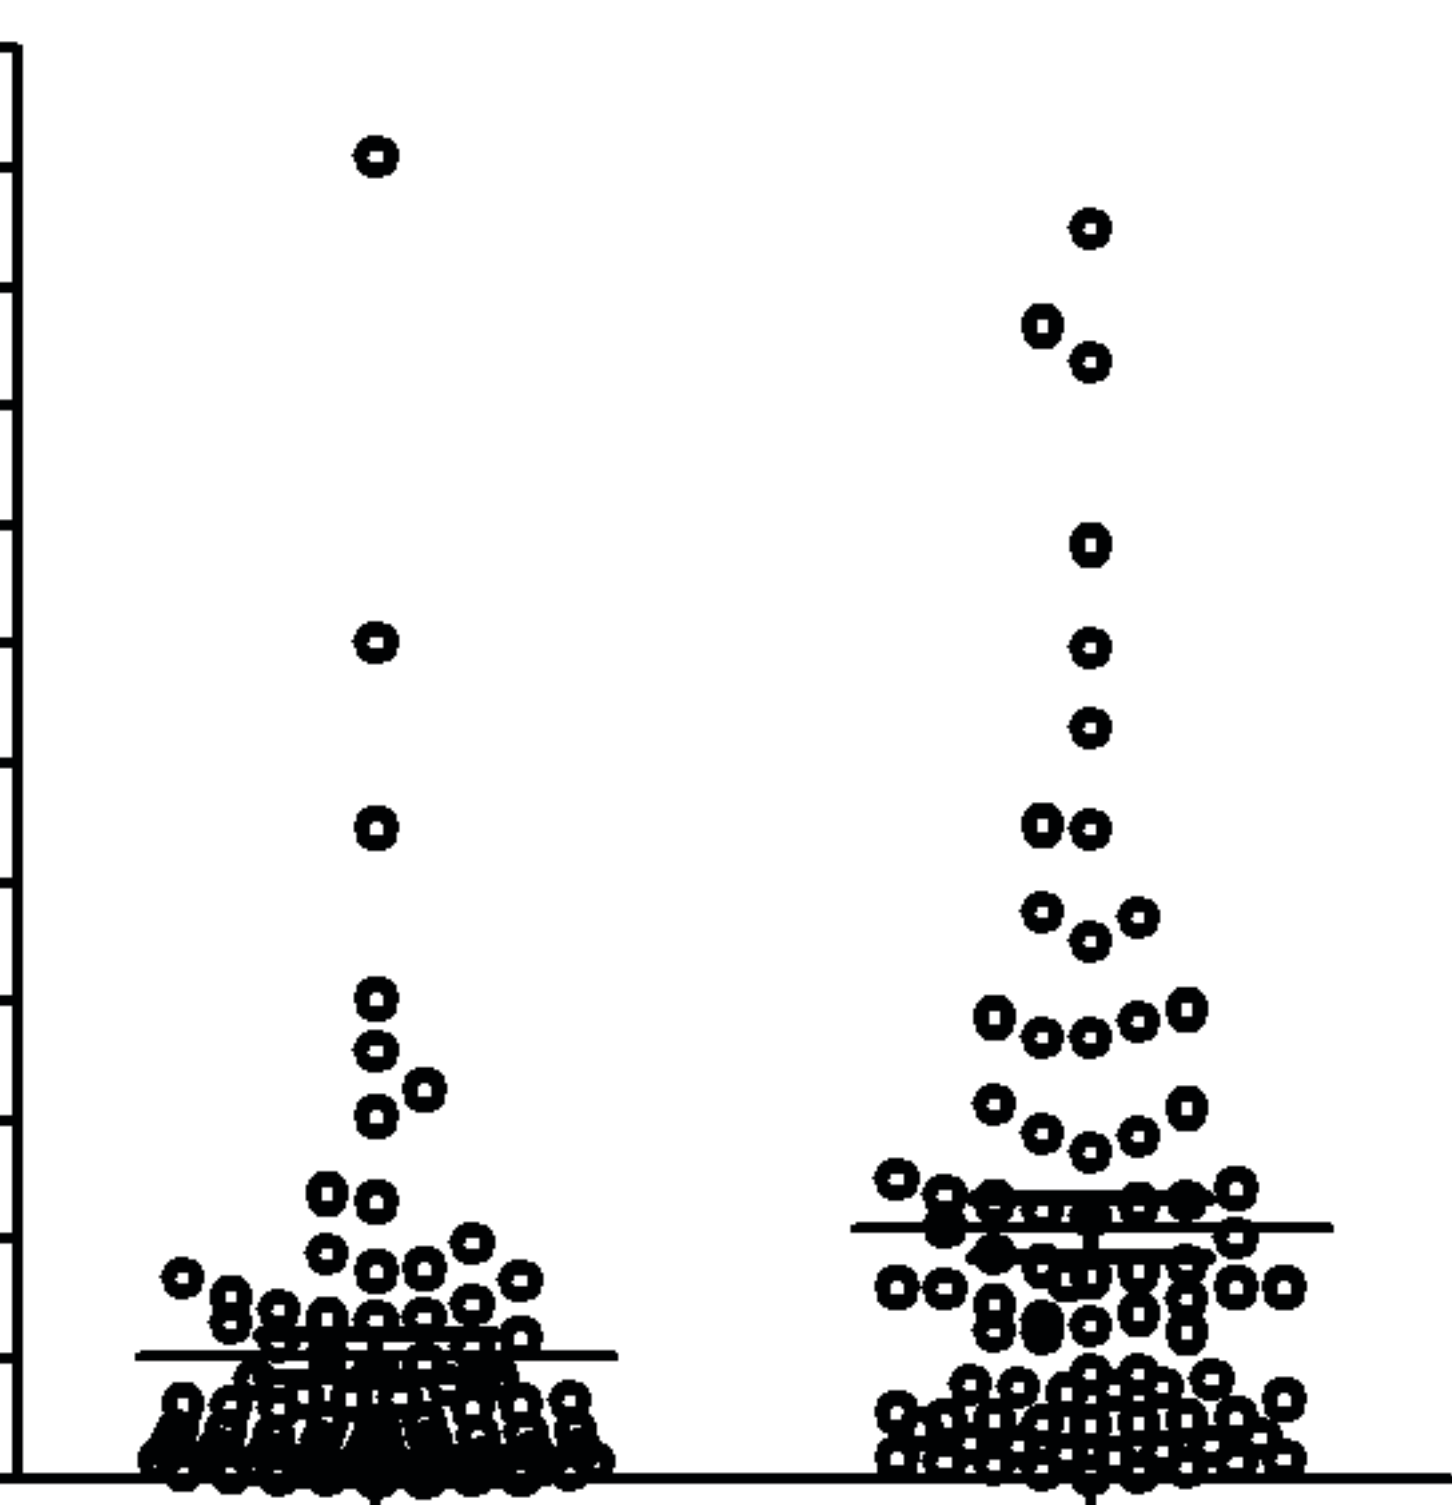

Supplement: MOESM3 [file 9676108]
